# Supplementary material
Source: Springer Nature journal article supplement (https://www.springermedizin.de/resource/supplementary/12933_2010_311_MOESM1_ESM.pdf/9540072)
Supplement: MOESM1 [file 9540072]

1120 patients with type 2 diabetes identified by questionnaire

81 did not join our chronic diabetic complications study

1039 patients with type 2 diabetes enrolled in our chronic diabetic complications study

First recruited 465 patients did not measure CRP;  
54 patients with CRP > 10mg/L representing acute inflammation

520 patients analyzed in this study
